# Supplementary material for: Impact of Metformin Treatment on Human Placental Energy Production and Oxidative Stress
Source: PubMed Central journal article supplement (PMC9247405; doi:10.3389/fcell.2022.935403), 2022-06-17

Supplementary Figure 1: Example of oxygen consumption rate changes in response to mitochondrial stress test from sample of primary trophoblast. Assay reagents were loaded onto the sensor cartridge: A) Oligomycin ( $2\mu\text{M}$ ), B) FCCP ( $2\mu\text{M}$ ) and C) ROT/AA ( $0.5\mu\text{M}$ ).

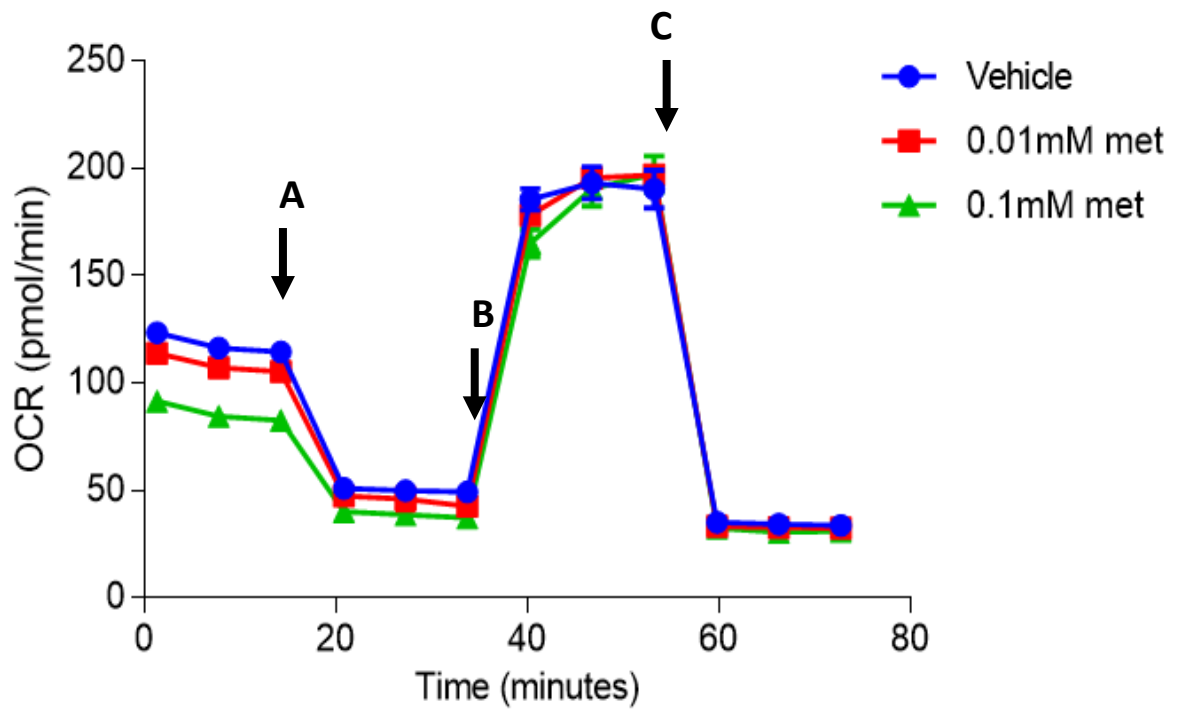

Supplement: Image1.pdf [file Image1.pdf]
